# Supplementary material
Source: PubMed Central journal article supplement (PMC6039119)
Supplement: NIHMS976663-supplement-table.pdf [file NIHMS976663-supplement-table.pdf]

**Supplementary Materials for  
Smartphone-based blood pressure monitoring via the oscillometric  
finger-pressing method**

Anand Chandrasekhar, Chang-Sei Kim, Mohammed Naji, Keerthana Natarajan,  
Jin-Oh Hahn, Ramakrishna Mukkamala\*

\*Corresponding author. Email: rama@egr.msu.edu

Published 7 March 2018, *Sci. Transl. Med.* **10**, eaap8674 (2018)  
DOI: 10.1126/scitranslmed.aap8674

**The PDF file includes:**

Table S1. Anthropomorphic information, number of practice trials, and all BP measurements per subject.  
Legend for movie S1

**Other Supplementary Material for this manuscript includes the following:**

(available at  
[www.sciencetranslationalmedicine.org/cgi/content/full/10/431/eaap8674/DC1](http://www.sciencetranslationalmedicine.org/cgi/content/full/10/431/eaap8674/DC1))

Movie S1 (.mp4 format). Video demonstration of the smartphone-based BP monitoring device.

**Table S1. Anthropomorphic information, number of practice trials, and all BP measurements per subject.** Exp, experienced; M, measurement (M1 is measurement 1); TA-MF, try-again message due to measurement failure; TA-CF, try-again message due to computation failure; TA-AF, try-again message due to actuation failure; --, no measurement due to early completion of protocol.

| User ID | Age (yrs) | Weight (kg) | Height (cm) | Gender | Number of practice trials | Systolic/Diastolic BP (mmHg)  |         |                         |        |        |        |                    |
|---------|-----------|-------------|-------------|--------|---------------------------|-------------------------------|---------|-------------------------|--------|--------|--------|--------------------|
|         |           |             |             |        |                           | Reference cuff device         |         | Smartphone-based device |        |        |        | Finger cuff device |
|         |           |             |             |        |                           | M1                            | M2      | M1                      | M2     | M3     | M4     | M1                 |
| New1    | 28        | 95          | 179         | Male   | 1                         | 111/82                        | 120/85  | 112/72                  | 111/73 | --     | --     | 108/71             |
| New2    | 26        | 87          | 180         | Male   | 3                         | Invalid reference measurement |         |                         |        |        |        |                    |
| New3    | 27        | 59          | 160         | Female | 1                         | 98/70                         | 104/70  | 104/64                  | TA-CF  | TA-CF  | TA-CF  | 112/66             |
| New4    | 21        | 67          | 176         | Male   | 1                         | 112/74                        | 101/75  | 104/66                  | 102/62 | --     | --     | 109/76             |
| New5    | 54        | 90          | 164         | Female | 2                         | 133/95                        | 129/114 | 134/91                  | TA-MF  | 131/88 | --     | 124/79             |
| New6    | 39        | 79          | 158         | Female | 2                         | 109/88                        | 110/91  | 120/80                  | 123/83 | --     | --     | 113/72             |
| New7    | 39        | 75          | 176         | Male   | 1                         | 108/71                        | 107/67  | 115/75                  | TA-MF  | TA-MF  | 102/64 | 115/70             |
| New8    | 51        | 104         | 172         | Female | 2                         | 121/86                        | 118/87  | 124/84                  | 122/82 | --     | --     | 120/75             |
| New9    | 41        | 75          | 162         | Female | 2                         | 106/79                        | 108/83  | 126/86                  | 113/75 | TA-CF  | 107/69 | 123/77             |
| New10   | 53        | 98          | 165         | Female | 3                         | 118/84                        | 115/86  | 103/65                  | TA-MF  | TA-CF  | TA-MF  | 109/63             |
| New11   | 33        | 80          | 181         | Male   | 1                         | 113/84                        | 113/76  | 110/70                  | 129/86 | 119/79 | --     | 109/66             |
| New12   | 31        | 58          | 168         | Female | 1                         | 118/89                        | 115/86  | 134/91                  | 127/87 | --     | --     | 137/76             |
| New13   | 40        | 71          | 175         | Male   | 1                         | 115/69                        | 115/74  | 112/72                  | 111/71 | --     | --     | 123/67             |
| New14   | 55        | 77          | 180         | Male   | 1                         | 108/77                        | --      | TA-CF                   | TA-MF  | TA-CF  | TA-CF  | 105/65             |
| New15   | 28        | 113         | 162         | Female | 2                         | 120/89                        | 120/89  | 117/77                  | TA-CF  | TA-CF  | TA-CF  | 122/75             |
| New16   | 24        | 83          | 169         | Male   | 1                         | 129/70                        | --      | TA-MF                   | TA-MF  | TA-MF  | TA-MF  | 113/67             |
| New17   | 56        | 70          | 163         | Female | 1                         | 110/77                        | 112/76  | 102/64                  | 115/75 | 108/68 | --     | 125/74             |
| New18   | 33        | 72          | 176         | Male   | 2                         | 103/67                        | 103/69  | 129/89                  | 128/88 | --     | --     | 99/61              |
| New19   | 41        | 53          | 165         | Female | 2                         | 100/65                        | 105/69  | 112/72                  | 101/61 | 106/68 | --     | 123/78             |
| New20   | 49        | 56          | 150         | Female | 1                         | 96/69                         | 101/73  | 109/71                  | TA-AF  | 109/69 | --     | 114/67             |
| New21   | 50        | 64          | 165         | Female | 2                         | 91/72                         | 103/77  | 104/64                  | TA-CF  | TA-CF  | TA-CF  | 109/67             |
| New22   | 49        | 56          | 155         | Female | 4                         | 99/65                         | 94/79   | 111/71                  | TA-CF  | 108/70 | --     | 113/68             |
| New23   | 31        | 54          | 164         | Female | 1                         | 103/73                        | 97/76   | 101/63                  | TA-CF  | TA-CF  | TA-CF  | 114/69             |

|       |    |     |     |        |    |         |         |        |        |        |        |         |
|-------|----|-----|-----|--------|----|---------|---------|--------|--------|--------|--------|---------|
| New24 | 40 | 77  | 168 | Female | 1  | 113/78  | 110/75  | 116/76 | 110/72 | --     | --     | 106/67  |
| New25 | 42 | 86  | 167 | Female | 1  | 99/76   | 99/78   | 113/73 | TA-AF  | 121/81 | --     | 124/69  |
| New26 | 48 | 113 | 165 | Female | 1  | 122/86  | 113/87  | 120/80 | 123/80 | --     | --     | 116/73  |
| New27 | 52 | 87  | 164 | Female | 2  | 134/85  | 133/95  | 118/78 | TA-MF  | 119/79 | --     | 146/85  |
| New28 | 38 | 65  | 155 | Female | 1  | 105/76  | 102/76  | 116/76 | 118/78 | --     | --     | 112/72  |
| New29 | 31 | 76  | 178 | Male   | 2  | 100/73  | 98/75   | 112/74 | TA-AF  | TA-MF  | 114/74 | 96/66   |
| New30 | 33 | 120 | 165 | Female | 1  | 117/70  | 108/65  | 102/64 | 110/70 | --     | --     | 122/68  |
| Exp31 | 28 | 69  | 172 | Male   | -- | 132/100 | 141/104 | 140/97 | 136/93 | --     | --     | 143/99  |
| Exp32 | 34 | 70  | 172 | Male   | -- | 139/102 | 132/100 | 139/96 | 134/91 | --     | --     | 135/97  |
| Exp33 | 28 | 71  | 171 | Male   | -- | 135/110 | 134/106 | 130/87 | 128/85 | --     | --     | 132/94  |
| Exp34 | 29 | 81  | 180 | Male   | -- | 131/104 | 135/105 | 136/96 | 135/92 | --     | --     | 138/99  |
| Exp35 | 46 | 69  | 172 | Male   | -- | 142/102 | 148/110 | 144/99 | 138/95 | --     | --     | 152/101 |

**Movie S1. Video demonstration of the smartphone-based BP monitoring device.** A user obtains a BP measurement with the device by (i) placing her/his index finger on the sensor according to line indicators near the sensor, (ii) viewing the smartphone screen while holding the device at heart level, and (iii) pressing her/his finger against the sensor so that the displayed finger pressure is maintained between target blue lines on the screen.
